# Supplementary material for: Enhancement of concrete performance via mixed limestone and granite powders
Source: Research Square preprint supplement (doi:10.21203/rs.3.rs-900543/v1), 2021-09-23
Supplement: Supplementary file 1 [file 3a98acd00306390f2d097be7.pdf]

**Table1.** Material properties

| Materials                | Properties                                                                     |
|--------------------------|--------------------------------------------------------------------------------|
| Ordinary Portland cement | Density: 3.15g/cm <sup>3</sup> ; Specific surface area: 360 m <sup>2</sup> /kg |
| Granite powder (GP)      | Specific surface area: 20000 m <sup>2</sup> /kg; Particle size: 0~20.23μm      |
| Limestone powder (LP)    | Specific surface area: 800 m <sup>2</sup> /kg; Particle size: 0~15μm           |
| Coarse aggregate         | Grading: 5~20mm                                                                |
| Fine aggregate           | Grading: 0~4.75mm                                                              |
| Water                    | Tap water                                                                      |
| Water-reducing agent     | Water reducing rate: 20%                                                       |

**Table2.** Main chemical composition of cement, granite, and limestone powders (%).

| Material         | CaO   | SiO <sub>2</sub> | Al <sub>2</sub> O <sub>3</sub> | Fe <sub>2</sub> O <sub>3</sub> | MgO  | SO <sub>3</sub> | MnO | Other |
|------------------|-------|------------------|--------------------------------|--------------------------------|------|-----------------|-----|-------|
| Cement           | 65.37 | 21.22            | 2.53                           | 3.09                           | 2.39 | 1.91            | —   | 3.49  |
| Granite powder   | 9.75  | 64.67            | 15.31                          | 3.38                           | 1.47 | —               | —   | 5.42  |
| Limestone powder | 95.33 | 1.11             | 0.31                           | 0.82                           | 0.33 | —               | —   | 2.10  |

**Table 3.** The mix proportions (unit weight, kg/m<sup>3</sup>).

| Symbol | W/C  | W   | C   | GP | LP | S   | A    | Ads |
|--------|------|-----|-----|----|----|-----|------|-----|
| C      | 0.48 | 144 | 300 | —  | —  | 639 | 1296 | 3   |
| G1     | 0.48 | 144 | 270 | 30 | —  | 639 | 1296 | 3   |
| G2     | 0.48 | 144 | 255 | 30 | 15 | 639 | 1296 | 3   |
| G3     | 0.48 | 144 | 240 | 30 | 30 | 639 | 1296 | 3   |
| G4     | 0.48 | 144 | 225 | 30 | 45 | 639 | 1296 | 3   |
| G5     | 0.48 | 144 | 210 | 30 | 60 | 639 | 1296 | 3   |

(W: water, C: cement, GP: granite powder, LP: limestone powder, S: fine aggregate, A: coarse aggregate).
